# Supplementary material for: Dietary riboflavin deficiency induces genomic instability of esophageal squamous cells that is associated with gut microbiota dysbiosis in rats
Source: Royal Society of Chemistry journal article supplement (doi:10.1039/d0fo01944e), 2020-01-01
Supplement: d0fo01944e1.pdf [file d0fo01944e1.pdf]

### Supplemental Figure 1

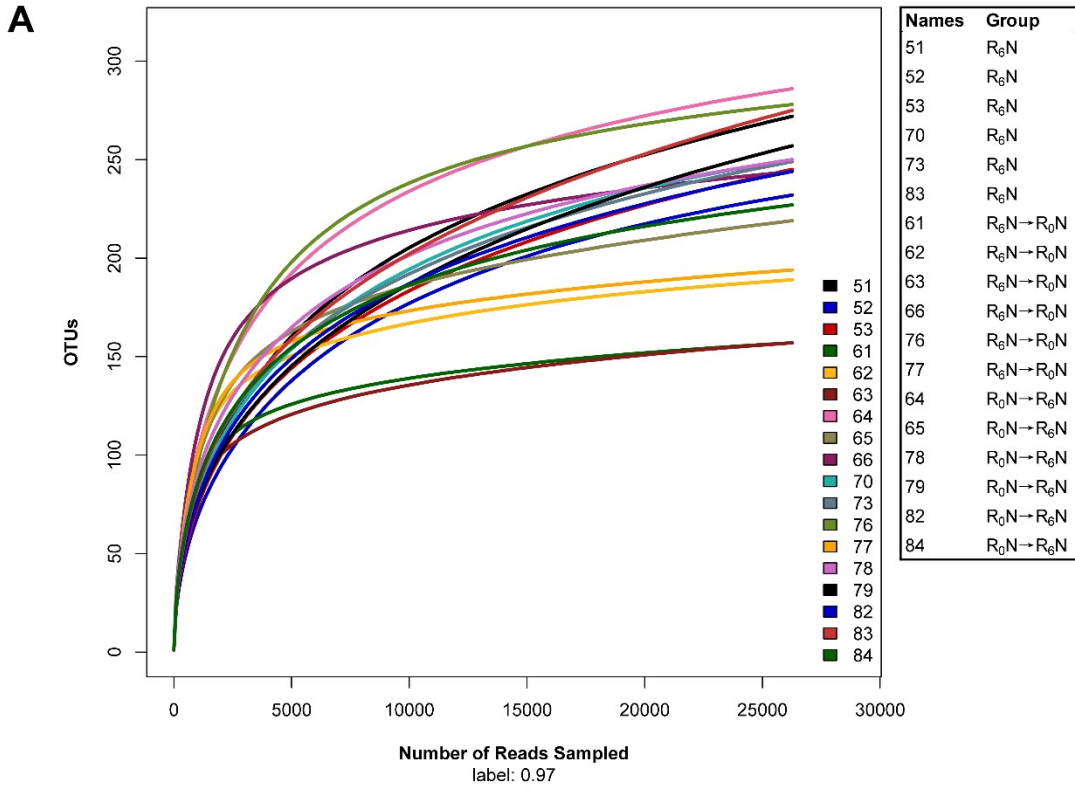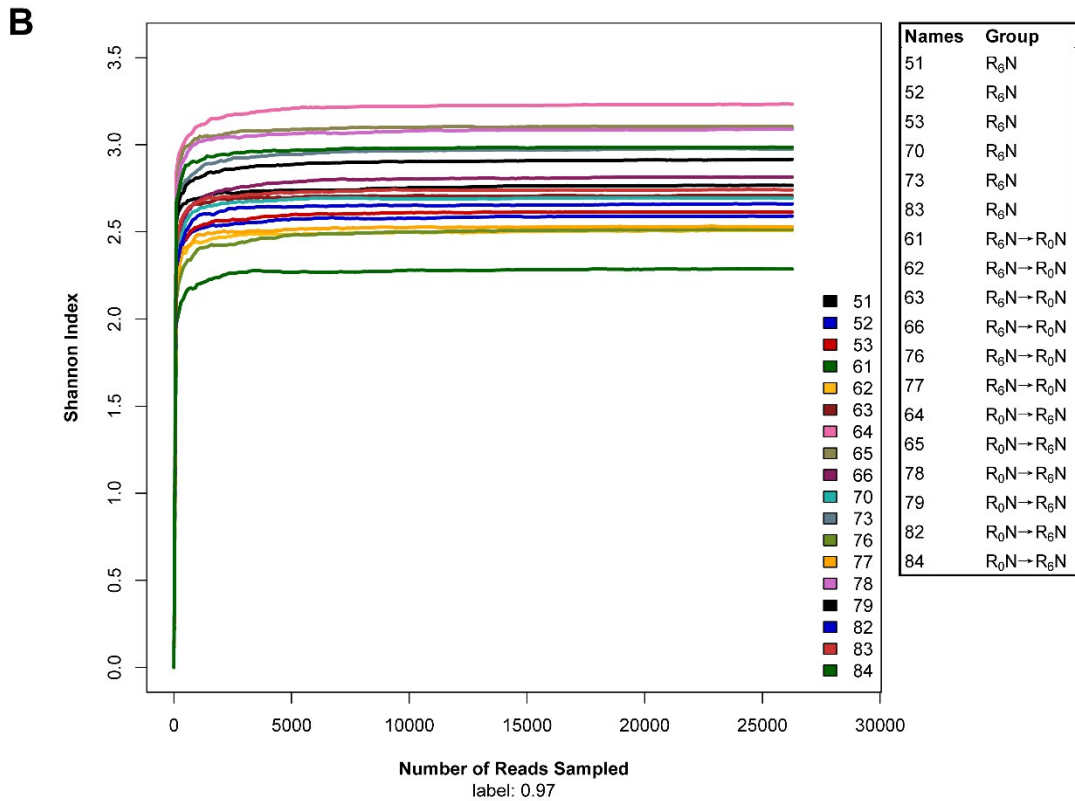

**upplemental Figure 1. Rarefaction curves (A) and Shannon-Wiener curves (B).**

## Supplemental Figure 2

**A**

| Genus                   | R6    | R6N   | Adj.P-value |
|-------------------------|-------|-------|-------------|
| <i>Lactococcus</i>      | 43.32 | 41.37 | > 0.05      |
| <i>Bacillus</i>         | 41.03 | 40.78 | > 0.05      |
| <i>Carnobacterium</i>   | 4.36  | 4.61  | > 0.05      |
| <i>Streptococcus</i>    | 2.24  | 2.21  | > 0.05      |
| <i>Romboutsia</i>       | 0.77  | 1.47  | > 0.05      |
| <i>Exiguobacterium</i>  | 1.19  | 1.37  | > 0.05      |
| <i>Enterococcus</i>     | 1.18  | 1.21  | > 0.05      |
| <i>Sphingomonas</i>     | 0.25  | 0.31  | > 0.05      |
| <i>Caulobacteraceae</i> | 0.25  | 0.21  | > 0.05      |
| <i>Bradyrhizobium</i>   | 0.09  | 0.12  | > 0.05      |

Percent: 0 20 40

**B**

| Genus                   | R6N   | R6N→R0N | R0N→R6N | Adj.P-value |
|-------------------------|-------|---------|---------|-------------|
| <i>Lactococcus</i>      | 41.37 | 3.52    | 31.57   | < 0.01      |
| <i>Bacillus</i>         | 40.78 | 3.81    | 30.69   | < 0.01      |
| <i>Carnobacterium</i>   | 4.61  | 0.43    | 3.53    | < 0.01      |
| <i>Streptococcus</i>    | 2.21  | 0.17    | 1.78    | < 0.01      |
| <i>Romboutsia</i>       | 1.47  | 4.00    | 4.14    | = 0.65      |
| <i>Exiguobacterium</i>  | 1.37  | 0.13    | 1.00    | < 0.01      |
| <i>Enterococcus</i>     | 1.21  | 0.43    | 1.21    | < 0.01      |
| <i>Sphingomonas</i>     | 0.31  | 23.85   | 5.32    | < 0.01      |
| <i>Caulobacteraceae</i> | 0.21  | 39.99   | 8.89    | < 0.01      |
| <i>Bradyrhizobium</i>   | 0.12  | 3.93    | 0.98    | < 0.01      |

Percent: 0 20 40

**Supplemental Figure 2. Relative abundance of gut microbiota composition at the genus level of R<sub>6</sub> and R<sub>6</sub>N groups (A) and R<sub>6</sub>N, R<sub>0</sub>N→R<sub>6</sub>N, R<sub>0</sub>N→R<sub>6</sub>N groups (B).**
