# Supplementary material for: Dietary riboflavin deficiency induces genomic instability of esophageal squamous cells that is associated with gut microbiota dysbiosis in rats
Source: Royal Society of Chemistry journal article supplement (doi:10.1039/d0fo01944e), 2020-01-01
Supplement: d0fo01944e2.pdf [file d0fo01944e2.pdf]

**Supplemental Table 1. The formula of AIN-93M purified diet**

| <b>Composition</b>             | <b>Content</b> | <b>Composition</b> | <b>Content</b> |
|--------------------------------|----------------|--------------------|----------------|
| <b>Calories</b>                | 3601 kcal/kg   | <b>Minerals</b>    |                |
| Protein's calories account for | 14.1%          | Calcium            | 5000 ppm       |
| Fat's calories account for     | 10.0%          | Phosphorus         | 3000 ppm       |
| Water content                  | 6.8%           | Potassium          | 3600 ppm       |
| Fat                            | 4.0%           | Sodium             | 1033 ppm       |
| Carbohydrate                   | 72.7%          | Magnesium          | 511 ppm        |
| Protein                        | 12.5%          | Iron               | 45 ppm         |
| Ash                            | 3.89%          | Zinc               | 35 ppm         |
| <b>Amino acids</b>             |                | Manganese          | 10 ppm         |
| Alanine                        | 3.3 g          | Copper             | 6 ppm          |
| Arginine                       | 4.5 g          | Iodine             | 0.2 ppm        |
| Aspartic acid                  | 8.0 g          | Chromium           | 1 ppm          |
| Glutamate                      | 25.5 g         | Inorganic sulfur   | 300 ppm        |
| Glycine                        | 2.3 g          | Chlorine           | 1613 ppm       |
| Lysine                         | 9.2 g          | <b>Vitamins</b>    |                |
| Methionine                     | 3.3 g          | Vitamin A          | 4 IU/g         |
| Cystine                        | 2.4 g          | Vitamin D          | 1 IU/g         |
| Tryptophan                     | 1.6 g          | Vitamin E          | 0.075 IU/g     |
| Proline                        | 14.3 g         | Vitamin K          | 0.86 ppm       |
| Serine                         | 6.7 g          | Thiamine           | 5 ppm          |
| Histidine                      | 3.3 g          | <b>Riboflavin</b>  | <b>6 ppm</b>   |
| Leucine                        | 10.9 g         | Niacin             | 30 ppm         |
| Isoleucine                     | 5.9 g          | Pantothenic acid   | 15 ppm         |
| Phenylalanine                  | 6.2 g          | Vitamin B6         | 6 ppm          |
| Tyrosine                       | 6.6 g          | Choline            | 1000 ppm       |
| Threonine                      | 4.7 g          | Folic acid         | 2 ppm          |
| Valine                         | 7.0 g          | Biotin             | 0.2 ppm        |
|                                |                | Vitamin B12        | 25 ppm         |
